# Supplementary material for: Plant diversity induces shifts from microbial generalists to specialist by enhancing niche differentiation, microbiome connectivity, and network stability in a temperate grassland
Source: Research Square preprint supplement (doi:10.21203/rs.3.rs-7752619/v1), 2025-11-07

low plant diversity

high plant diversity

network connectivity

1

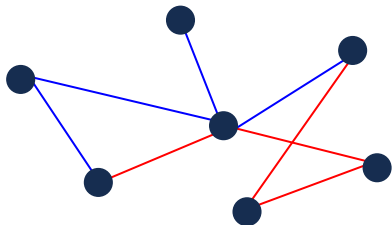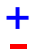

correlation type

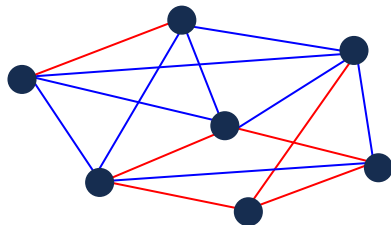

niche overlap

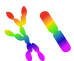

'generalists'

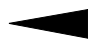

'specialists'

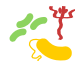

2

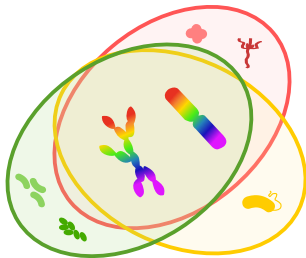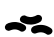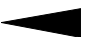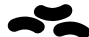

betweenness centrality

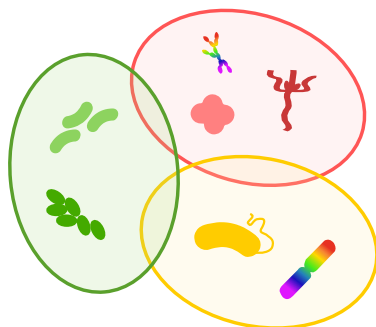

Supplement: Supplementary file 1 [file 57be079e89cca35852718534.pdf]
